# Supplementary material for: A conserved mitochondrial surveillance pathway is required for defense against Pseudomonas aeruginosa
Source: PubMed Central journal article supplement (PMC5510899; doi:10.1371/journal.pgen.1006876), 2017-06-29
Supplement: pgen.1006876.s003.pdf [file pgen.1006876.s003.pdf]

A

| Condition | Worm strain                      | Bacterial strain          | Description | PMID       |
|-----------|----------------------------------|---------------------------|-------------|------------|
| 1         | <i>glp-4(bn2)</i>                | <i>P. aeruginosa</i> PA14 | LK, Liquid  | This study |
| 2         | <i>glp-4(bn2)</i>                | <i>E. coli</i> OP50       | LK, Liquid  | This study |
| 3         | <i>glp-4(bn2)</i>                | <i>E. coli</i> OP50       | NGM, Plate  | This study |
| 4         | <i>glp-4(bn2)</i>                | <i>E. coli</i> OP50       | SK, Plate   | This study |
| 5         | <i>glp-4(bn2)</i>                | <i>P. aeruginosa</i> PA14 | SK, Plate   | This study |
| 6         | N2                               | <i>E. coli</i> OP50       | BHI, Plate  | 21731485   |
| 7         | N2                               | <i>C. albicans</i> DAY185 | BHI, Plate  | 21731485   |
| 8         | <i>fer-15(b26ts);fem-1(hc17)</i> | <i>E. coli</i> OP50       | TSA, plate  | 20617181   |
| 9         | <i>fer-15(b26ts);fem-1(hc17)</i> | <i>S. aureus</i> RN6390   | TSA, plate  | 20617181   |
| 10        | N2                               | <i>E. coli</i> OP50       | SK, Plate   | 20133945   |
| 11        | N2                               | <i>Y. pestis</i> KIM5     | SK, Plate   | 20133945   |

B

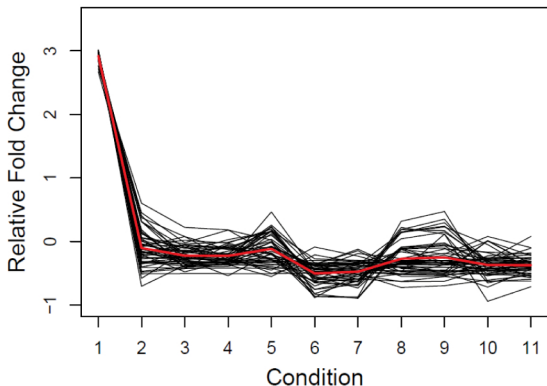

S3 Fig. Clustering of genes upregulated in pyoverdine-dependent liquid killing
