# Supplementary material for: A conserved mitochondrial surveillance pathway is required for defense against Pseudomonas aeruginosa
Source: PubMed Central journal article supplement (PMC5510899; doi:10.1371/journal.pgen.1006876), 2017-06-29
Supplement: pgen.1006876.s007.pdf [file pgen.1006876.s007.pdf]

A

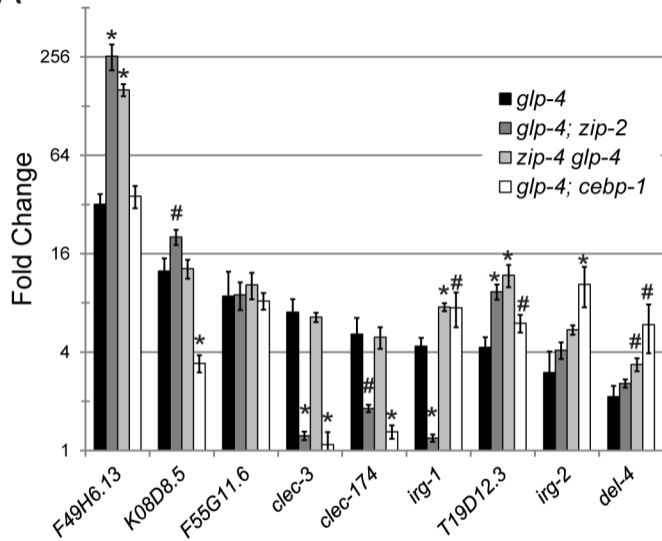

B

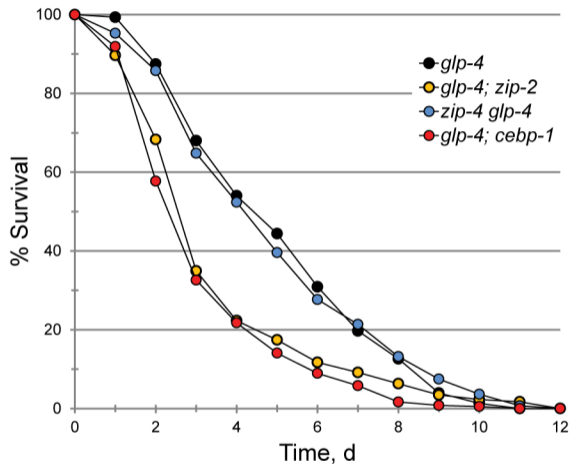

S7 Fig. bZIP family members show different roles in innate immunity
